# Supplementary material for: Containing medical expenditure: lessons from reform of Beijing public hospitals
Source: PubMed Central journal article supplement — BMJ. 2019 Jun 22;365:l2369. doi: 10.1136/bmj.l2369 (PMC6598718; doi:10.1136/bmj.l2369), 2019-06-22
Supplement: chinesetranslation.bmj.k2369.pdf [file chinesetranslation.bmj.k2369.pdf]

# 北京市医药分开综合改革控制医疗费用的经验

刘晓云和同事的评价发现，北京医药分开综合改革降低了医院的药品收入占比，引导更多门诊患者利用基层医疗服务

中国的二、三级公立医院的医疗收入高度依赖药品和高价值耗材的使用。破除“以药补医”是近年来中国公立医院改革的一个重要目标[1]。从2009年开始，中国医药卫生体制改革将公立医院改革试点作为一项重要内容，力图解决上述挑战[2]。改革采取了一系列重要措施，包括公立医院管理体制和运行机制、补偿机制、支付制度改革等[3]。这些改革措施取得了一定的进展和成效，但医疗费用的快速增长和以药补医机制仍然是亟待解决的重要挑战[3, 4]。患者对基层医疗服务的利用不足，许多常见病、多发病也要到二、三级医院就医[5]。国家鼓励各地积极探索创新经验，以推动医药卫生体制改革在这一重要领域有所突破。在此背景下，北京市于2017年实施医药分开综合改革，控制医疗费用不合理增长。本文对这一创新性的改革案例进行分析，总结经验。

## 北京市医药分开综合改革介绍

2017年北京市常住人口为2 170万人，人均GDP为12.9万元。北京市拥有116家三级医院，医疗资源拥有量超过中国其他城市。2016年，全市门急诊服务中，63.0%来自公立医院，只有27.1%来自基层医疗机构，而全国的基层医疗机构提供的门诊服务占比为55.1%。2016年北京市三级医院的药占比为45.1%，高于全国的平均水平38.9%[6]。

北京市于2017年4月启动了医药分开综合改革（详细改革措施见表1），改革的目的是破除以药补医，控制医疗费用的不合理增长，建立科学合理的补偿机制[7]。中央有关部门和北京市政府成立了北京医药分开

表1：北京市医药分开综合改革内容

| 改革措施        | 具体改革内容                                                                                                                      |
|-------------|-----------------------------------------------------------------------------------------------------------------------------|
| 1. 药品零差率    | 北京市所有公立医疗机构取消15%的药品加成，实行药品零差率销售。                                                                                            |
| 2. 设立医事服务费  | 阶梯式的医事服务费，医院级别越高，医师职称越高，则医事服务费也相应较高。如：三级、二级和基层的主治医师的医事服务费分别为人民币50、30和20元，患者自付的医事服务费分别为人民币10、2和1元。主任医师的医事服务费分别为人民币80、70和60元。 |
| 3. 调整医疗服务价格 | 调整435项医疗服务价格，提高手术、中医等服务价格，降低大型检查的价格（如CT和核磁共振）。这些服务项目都纳入医保报销范围，改革前后的报销比例没有变化。                                                |
| 4. 提高药品可及性  | 基层医疗机构与二、三级医院药品目录对接；对符合条件的慢性病患者提供2个月的长处方。                                                                                   |

改革协调小组，采取了双组长制，由国家卫生健康委员会主任和北京市市长共同牵头协调改革进程。北京市卫生健康委员会作为协调机构，与财政局、民政局、人力资源社会保障局等部门保持紧密合作。

此次改革以价格调整作为主要措施。根据国家统一部署，取消15%的药品加成，实施药品零差率销售。规范调整435项医疗服务价格，提高手术、中医等服务价格，降低大型检查的价格（如CT和核磁共振），引导医务人员采用更合理的服务提供行为。北京市医药分开综合改革的一项创新性举措是设立医事服务费，对医院因取消药品加成而造成的经济损失进行补偿，也更好地体现医务人员的劳务价值。

为了鼓励更多患者利用基层医疗服务，改革也扩大了基层医疗机构的药品可及性，对符合条件的慢性病患者提供2个月的长处方。医事服务费的设置呈阶梯式：三级医院、二级医院、基层医疗机构依次递减。患者在基层医疗机构自付的医事服务费也低于二、三级医院。

2012年开始北京市在5所公立医院的试点改革为本次改革积累了经验[8]。改革设计阶段，对价格改革可能导致的医院收入变化进行反复的认真测算。

## 北京市医药分开综合改革的效果 改革对门诊患者流向和住院患者平均住院日的影响

北京市医药分开综合改革最重要的一个产出是促进了患者对门诊服务的合理利用，促使部分患者从三级医院下沉到基层医疗机构[9]。改革实施一年后，三级医院门诊患者的数量下降了11.9%，而基层医疗机构的门诊患者数量上升了15.0%。图1展示了基于间断时间序列法分析的基层医疗机构门诊患者数量的变化[10]。同一时期，全国的三级医院门诊量上升了6.1%，基层医疗服务门诊量仅增加1.4%[6]。

实现这一改革效果的可能原因有两个[9]。一是医事服务费的设置。三级医院的医师服务费高于基层，这促使一部分常见病患者，特别是患有慢性病的老年人，更多地到基层医疗机构常规开药。其次，基层医疗机构的药品目录与二、三级医院对接，符合条件的慢性患者可以获得2个月的长处方，提高了基层的药品可及性，也能够吸引一部分患者到基层就医。

药品收入的减少促使公立医院改善管理，提高资源使用和服务提供的效率，三级医院的平均住院日从改革前的8.9天下降到8.3天，二级医院从10.0天下降到8.8天。

### 要点

- 2017年北京市实施了医药分开综合改革，取消药品加成，设立医事服务费，规范调整服务价格，旨在破除以药补医，控制医疗费用的不合理增长。
- 改革显著降低了医院医疗收入的药占比，促使部分门诊患者从三级医院下沉到基层医疗卫生机构。改革后，核磁共振和CT等大型检查的使用率有所提高。
- 公立医院、医务人员和患者三方之间的利益协调一致，是此次改革取得成效的重要机制。北京医药分开综合改革的经验可为中国和其他发展中国家的公立医院改革提供借鉴参考。

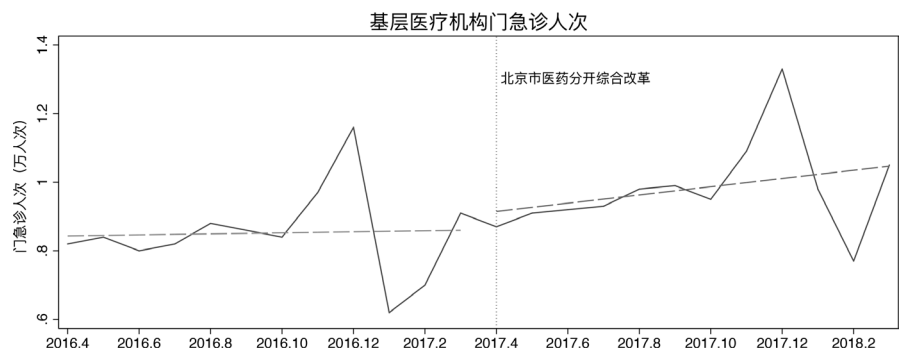

图1：北京市基层医疗机构门诊量间断时间序列分析（2016-2017）

表2：北京市公立医疗机构的药占比

|      | 改革前    | 改革后    | 变化     |
|------|--------|--------|--------|
| 三级医院 | 45.14% | 36.98% | -8.16% |
| 二级医院 | 52.03% | 44.25% | -7.78% |
| 基层机构 | 83.77% | 80.98% | -2.79% |

### 改革对医疗费用控制和费用结构的影响

北京医药分开综合改革有效控制了医疗费用的过快增长，降低了公立医院的药占比[10]。北京市卫生总费用年增长率由改革前的6.94%下降到改革后的4.73%[6]。三级医院医疗费用的药占比则由改革前的45.1%下降到改革后的37.0%。基层医疗机构的药占比下降了2.79个百分点(表2)。

改革促使部分轻症患者从三级医院下沉到基层医疗机构，这是实现控制费用不合理增长的主要机制。部分门诊患者分流到基层后，仍在三级医院就诊的患者可能病情较重，从而使次均费用上升。次均门诊费用上升使得三级医院门诊医疗总费用上升13.06%，而门诊患者数量下降使得门诊医疗总费用下降11.9%，这两个因素的综合作用使得三级医院的门诊总医疗费用仅上升0.4%[11]。慢性病患者更多地利用基层医疗卫生服务，从而将更多的三级医院医疗资源留给疑难杂症患者。

取消15%的药品加成使得药占比下降，结束了长期以来公立医院以药补医的补偿机制。公立医院由于药品零差率造成的经济损失可以由医事服务费和其他价格调整予以补偿[11]。

### 对进一步完善改革措施的政策建议

北京市在医药分开综合改革和控制医疗费用不合理增长方面取得了长足进步。这些经验对于中国其他省市，乃至其他发展中国家的公立医院改革有重要的借鉴意义。北京市也需要进一步巩固医药分开综合改革的成效。

### 进一步加强对大型检查和高价值医用耗材的管理

核磁共振和CT的价格降低旨在减少公立医院对大型影像检查收入的依赖。但公立医院的逐利机制难以在短期内彻底扭转。医院可能会将药品的成本转移到其他的服务项目上[12]。评价发现改革后公立医院的核磁共振和CT的服务量大幅提高。三级医院核磁共振使用量增加了35.7%，二级医院增加了41.7%(图2)。医院通过提高服务量来弥补由于价格调整带来的经济损失[9]。

卫生行政和医保部门应加大对大型检查和高价值医用耗材的管理力度，减少不必要的大型检查和高价值耗材的使用，包括更大范围的服务价格调整、对高价耗材使用的

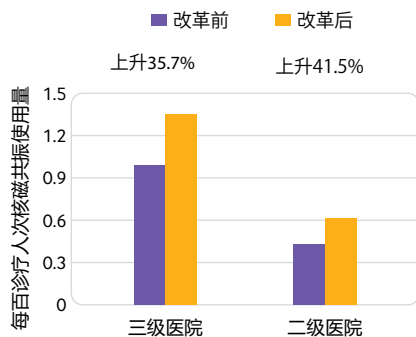

图2：每百诊疗人次核磁共振使用量

限制以及支付方式改革等，进一步破除医疗机构和医务人员的逐利行为。

### 进一步加强基层医疗卫生服务能力

北京医药分开综合改革成功促进了分级诊疗的实现，部分患者从三级医院分流到基层医疗机构。基层医疗机构的门诊服务量大大增加。如果不能及时增加对基层医疗机构的投入，基层医疗服务的质量将会受到影响。

基层医疗机构应进一步增强服务能力，提高卫生服务质量，以应对因改革而增加的门诊工作量，包括提高卫生人才队伍的数量和质量、改善经济和非经济激励机制，以及其他质量管理措施[5]。

### 进一步开展对服务质量和健康结局的监测评价

北京医药分开综合改革从启动之日，对部分公立医院和基层医疗机构的核心指标进行每日监测。并且委托北京大学研究团队针对改革过程和效果进行独立的第三方评价。这些监测评价活动有助于及时总结改革的经验。但目前的监测评价主要集中在医疗服务量、医疗收入和结构等内容上。改革在控制医疗费用不合理增长的同时，不应以降低服务质量，甚至损害健康结局为代价。因此，应进行长期的针对医疗服务质量和健康结局的监测评价。

### 结论

北京医药分开综合改革利用价格杠杆，引导患者合理就医，控制了医疗费用的不合理增长。改革措施将公立医院、医务人员和患者三方利益协调一致，这是实现改革效果的重要机制。中国借鉴发达国家经验，正在建立基层首诊、双向转诊的分级诊疗制度。北京市医药分开综合改革通过价格改革实现分级诊疗目标，为分级诊疗制度的建立提供了创新经验。

感谢北京市卫生健康委员会为本研究提供的数据和信息支持。北京大学的庄昱、周书铎和杨朔提供数据分析技

术支持。英国利物浦热带医学院的James Chia提供了英文编辑支持。

**撰稿者贡献：**刘晓云、袁蓓蓓、徐进和孟庆跃的主要研究领域是卫生体系改革，马晓晨和方海主要的研究领域是卫生经济学。孟庆跃和刘晓云领导了北京市医药分开综合改革的评价，所有作者参与了研究设计、资料收集和分析。刘晓云起草了文章，所有作者参与文章修改，并审阅了最终稿。

**利益冲突：**作者阅读并理解了BMJ的利益冲突政策，没有需要声明的利益冲突。

**出处和评议：**委托，外部同行评议。

这篇文章是北京大学中国卫生发展研究中心建议和The BMJ委托的系列文章的一篇。The BMJ对外部评审、编辑和出版全程管理。文章出版费由北京大学医学部支持。

刘晓云 教授

徐进 讲师

袁蓓蓓 副研究员

马晓晨 讲师

方海 教授

孟庆跃 教授

北京大学中国卫生发展研究中心

**通讯作者：**刘晓云

xiaoyunliu@pku.edu.cn

**译者：**刘晓云，北京大学中国卫生发展研究中心

- Meng Q, Mills A, Wang L, et al. What can we learn from China's health system reform? *BMJ* 2019;365:l2349. doi:10.1136/bmj.l2349
- 中共中央 国务院. 中共中央 国务院关于深化医药卫生体制改革的意见. 中发〔2009〕6号. 2009.
- Xu J, Jian W, Zhu K, et al. Reforming public hospital financing in China: progress and challenges. *BMJ* 2019;365:l4015. doi:10.1136/bmj.l4015
- He J. China's ongoing public hospital reform: initiatives, constraints and prospect. *Journal of Asian Public Policy* 2011;4:342-9.
- Ma X, Wang H, Yang L, et al. Realigning the incentive system for China's primary health care providers. *BMJ* 2019;365:l2406. doi:10.1136/bmj.l2406
- 国家卫生健康委员会. 2018中国卫生与健康统计年鉴. 中国协和医科大学出版社. 北京. 2018.
- 北京市政府. 北京市政府医药分开综合改革实施方案. 北京. 2017.
- 封国生, 朱恒鹏, 付明卫. 北京医药分开改革效果的实证分析. *中华医院管理杂志*, 2014, 30(12):881-885.
- 周书铎, 庄昱, 杨朔, 等. 北京市医药分开综合改革对门急诊患者就医流向的影响研究. *中国卫生政策研究*, 2017, 11(7): 37-41.
- 庄昱. 北京市医药分开综合改革对医疗费用控制的效果研究. 北京大学. 2018.
- 庄昱, 周书铎, 杨朔, 等. 北京市医药分开综合改革对门急诊费用控制的机制研究. *中国卫生政策研究*, 2017, 10(12):9-14.
- Lee IH, Bloor K, Hewitt C, et al. International experience in controlling pharmaceutical expenditure: influencing patients and providers and regulating industry - a systematic review. *Journal of Health Services Research & Policy* 2015;20:52-9.

Cite this as: *BMJ* 2019;365:k2369

<http://dx.doi.org/10.1136/bmj.k2369>
